# Supplementary material for: Selection of Shine-Dalgarno sequences in plastids
Source: PubMed Central journal article supplement — Nucleic Acids Res. 2010 Oct 21;39(4):1427–38. doi: 10.1093/nar/gkq978 (PMC3045613; doi:10.1093/nar/gkq978), 2010-10-21
Supplement: supp_gkq978_BockSupplMat.pdf [file supp_gkq978_BockSupplMat.pdf]

**Supplemental Table 1.** List of oligonucleotides used in this study.

| <b>Oligo</b> | <b>Sequence 5' → 3'</b>                                                                     | <b>Use</b>     |
|--------------|---------------------------------------------------------------------------------------------|----------------|
| pOD1-F       | GATCCAAATACTGCAGTTTAACTTTAAGAAGGAGATATACC                                                   | pOD1           |
| pOD1-R       | CATGGGTATATCTCCTTCTTAAAGTTAACTGCAGTATTTG                                                    |                |
| pOD2-F       | GATCCAAATACTGCAGCTTAGAATATTGAAGGAGATATACCCATCTATTATAAATAGTGCA                               | pOD2 from pOD1 |
| pOD2-R       | CTATTTATAATAGATGGGTATATCTCCTTCAATATTCTAAGCTGCAGTATTTG                                       |                |
| pOD3-F       | GATCCAAATACTGCAGAGATACAATAAGAAGGAGATATACCCATCTGTATTAAATAGTGCA                               | pOD3 from pOD2 |
| pOD3-R       | CTATTTAATACAGATGGGTATATCTCCTTCTTATTGTATCTCTGCAGTATTTG                                       |                |
| pOD4-F       | GTTTAACTTTAAGAAGGAGATATACATATGTAATAAGAAGGAGATATACC                                          | pOD4 from pOD1 |
| pOD4-R       | CATGGGTATATCTCCTTCTTATTACATATGTATATCTCCTTCTTAAAGTTAACTGCA                                   |                |
| pOD5-F       | GTTTAACTTTAAGAAGGAGATATACATATGTAGTAAGAAGGAGATATACATATGTAATAAGAAGGAGATATACC                  | pOD5 from pOD1 |
| pOD5-R       | CATGGGTATATCTCCTTCTTATTACATATGTATATCTCCTTCTTACTACATATGTATATCTCCTTCTTAAAGTTAAA<br>CTGCA      |                |
| pOD6-F       | GTTTAACTTTAAGAAGGAGTAAGAAGGAGATATACC                                                        | pOD6 from pOD1 |
| pOD6-R       | CATGGGTATATCTCCTTCTTACTCCTTCTTAAAGTTAACTGCA                                                 |                |
| pOD7-F       | GTTTAACTTTAAGAAGGAGTAAGAAGGAGTAAGAAGGAGATATACC                                              | pOD7 from pOD1 |
| pOD7-R       | CATGGGTATATCTCCTTCTTACTCCTTCTTACTCCTTCTTAAAGTTAACTGCA                                       |                |
| pOD8-F       | GTTTAACTTTAAGAAGGAGATATACATATGGGTAAATAAGAAGGAGATATACC                                       | pOD8 from pOD1 |
| pOD8-R       | CATGGGTATATCTCCTTCTTATTAACCCATATGTATATCTCCTTCTTAAAGTTAACTGCA                                |                |
| pOD9-F       | GTTTAACTTTAAGAAGGAGATATACATATGGGATAGTAAGAAGGAGATATACATATGGGTAAATAAGAAGGAGA<br>TATACC        | pOD9 from pOD1 |
| pOD9-R       | CATGGGTATATCTCCTTCTTATTAACCCATATGTATATCTCCTTCTTACTATCCCATATGTATATCTCCTTCTTAAA<br>GTAAACTGCA |                |
| pOD10-F      | CATGGGTGAAAATTTATATTTTCAAAG                                                                 | TEV in pOD1    |

|           |                                                                              |                                                                                                  |
|-----------|------------------------------------------------------------------------------|--------------------------------------------------------------------------------------------------|
| pOD10-R   | CATGCTTTGAAAATATAAATTTTCACC                                                  |                                                                                                  |
| pOD11-F   | GTTTAACTTTAAGAAGGAGATATACATATGGGAGAAGGAGATATAACC                             | pOD11 from pOD10<br>pOD17 from pOD1                                                              |
| pOD11-R   | CATGGGTATATCTCCTTCTCCCATATGTATATCTCCTTCTTAAAGTTAAACTGCA                      |                                                                                                  |
| pOD12-F   | GTTTAACTTTAAGAAGGAGATATACATATGGGAGAAGGAGATATAACC                             | pOD12 from pOD10<br>pOD18 from pOD1                                                              |
| pOD12-R   | CATGGGTATATCTCCTTCTCCCATATGTATATCTCCTTCTCCCATATGTATATCTCCTTCTTAAAGTTAAACTGCA |                                                                                                  |
| pOD13-F   | GTTTATCTTTATGAAGGAGATATAACC                                                  | pOD13 from pOD10<br>pOD19 from pOD1                                                              |
| pOD13-R   | CATGGGTATATCTCCTTCATAAAGATAAACTGCA                                           |                                                                                                  |
| pOD14-F   | GATCCAAATACTGCAGCTTACAATATTGAAGGAGATATACATATGGGTATTATAAATAGTGCA              | pOD14 from pOD13<br>pOD15 from pOD14<br>pOD22 from pOD15<br>pOD20 from pOD19<br>pOD21 from pOD20 |
| pOD14-R   | CTATTTATAATACCCATATGTATATCTCCTTCAATATTGTAAGCTGCAGTATTTG                      |                                                                                                  |
| P16Srrn-F | CAAGCGGTGGAGCATGTGG                                                          | generation of<br>hybridization probes                                                            |
| P16Srrn-R | GGCGGTGTGTACAAGGCC                                                           |                                                                                                  |
| P7247     | CCCAGAAAGAGGCTGGCCC                                                          |                                                                                                  |
| P7244     | CCCAAGGGGCGGGAAGTGC                                                          |                                                                                                  |
| PZF9      | TTTTCATATGAGTAAAGGAGAAGAAGT                                                  |                                                                                                  |
| PZF10     | TTTTATTAATGATTAGTTCATCCATGCC                                                 |                                                                                                  |

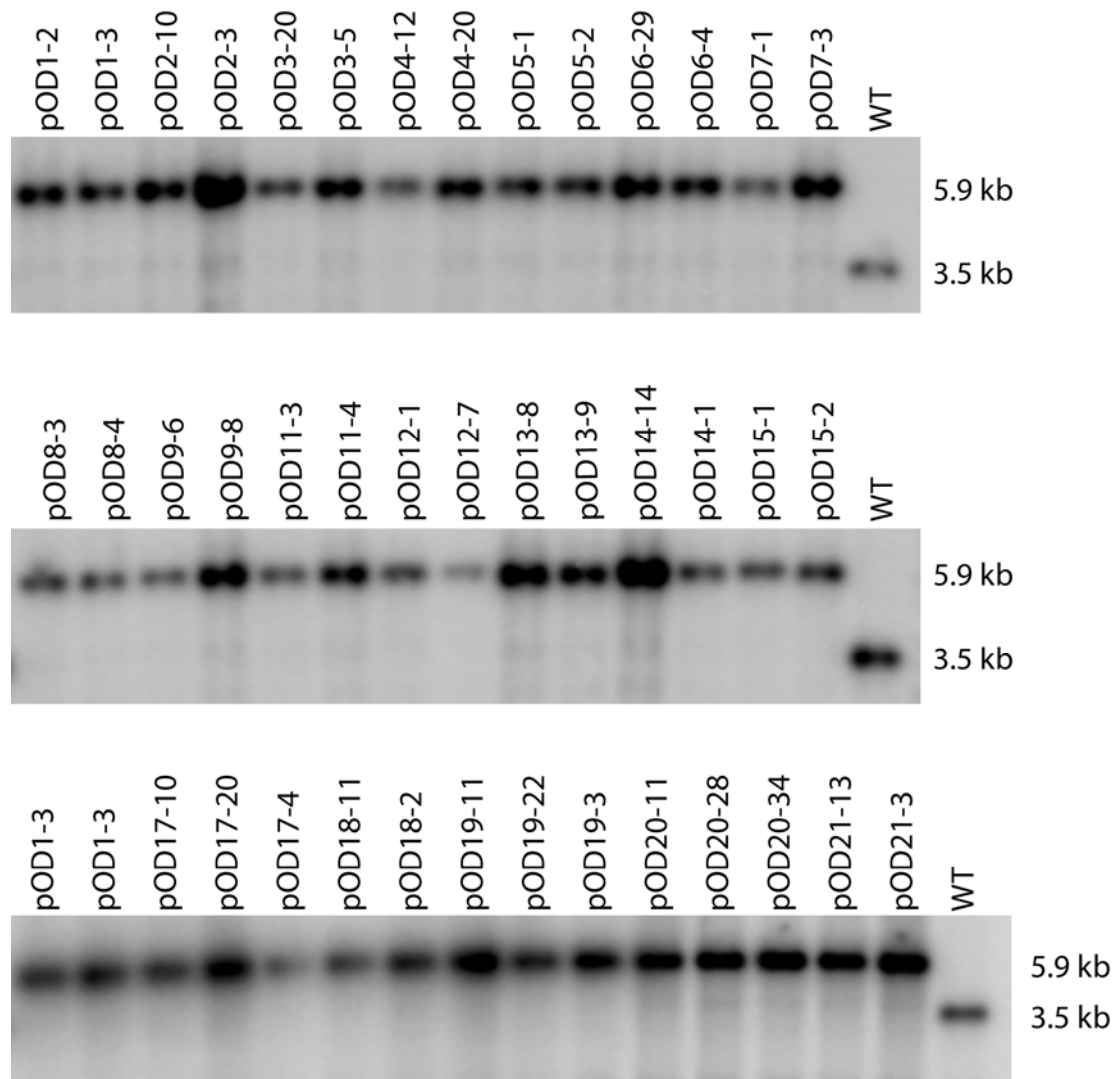

**Supplemental Figure 1.** Isolation of homoplasmic transplastomic tobacco lines obtained with pOD transformation vectors. Total cellular DNA samples were digested with the restriction enzyme BglIII, separated in 1% agarose gels and hybridized to a *psaB*-specific probe (cp. Figure 1). Absence of the 3.5 kb hybridization signal specific to the wild-type plastid genome indicates homoplasmy of the transplastomic lines. Instead, all transplastomic lines show a hybridization signal of 5.9 kb. The size difference of 2.4 kb corresponds to the added sizes of the *gfp* and *aadA* cassettes.
